# Supplementary material for: Structural characterization of polysaccharide purified from Amanita caesarea and its pharmacological basis for application in Alzheimer's disease: endoplasmic reticulum stress
Source: Royal Society of Chemistry journal article supplement (doi:10.1039/d1fo01963e), 2021-01-01
Supplement: d1fo01963e1.pdf [file d1fo01963e1.pdf]

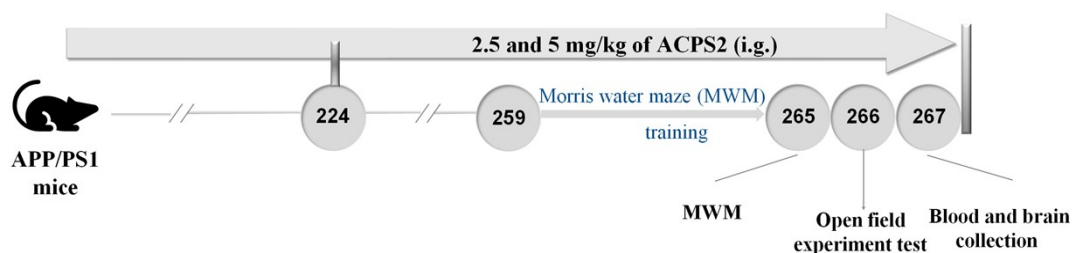

**Figure S1** Experimental procedure of APP/PS1 mice feeding and administration protocol.

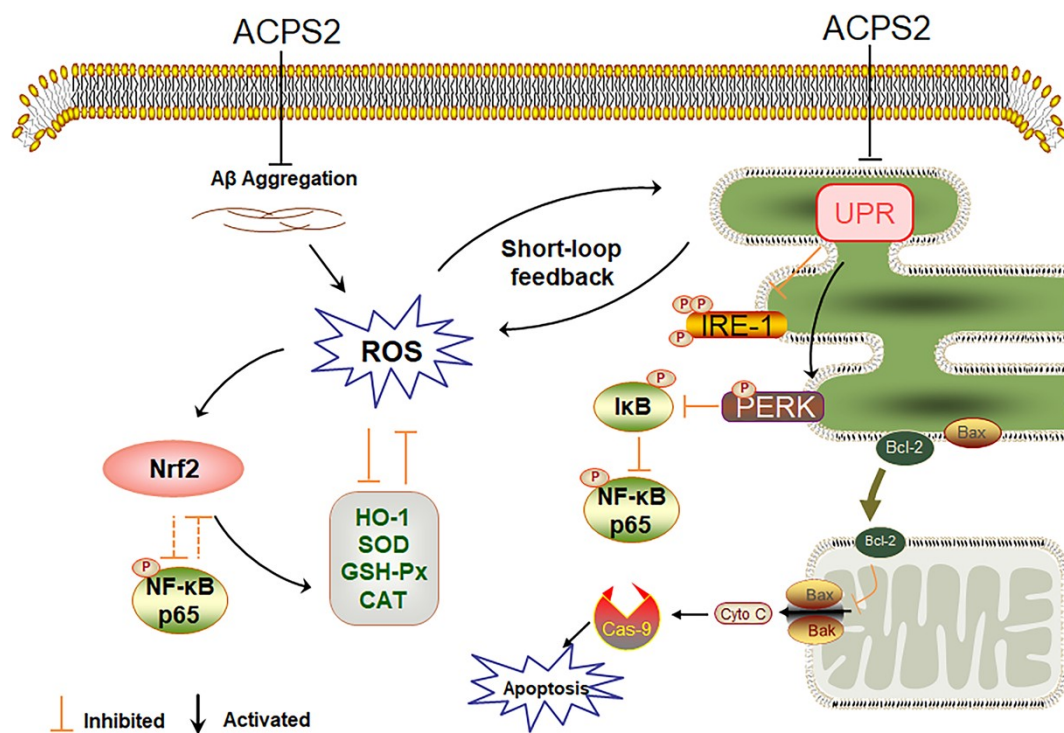

**Figure S2** Schematic illustration of putative mechanisms of ACPS2-mediated anti-AD. ACPS2 exerted anti-AD effects by regulating Nrf2 signaling, thereby inhibiting endoplasmic reticulum stress and NF- $\kappa$ B activation.

**Table S1** Primary and secondary antibodies used for Western blotting

| Name                                                 | Item number | Molecular Weight (kDa) | Dilution rate |
|------------------------------------------------------|-------------|------------------------|---------------|
| PERK <sup>a</sup>                                    | bsm-51385m  | 122                    | 1/1000        |
| P- PERK (Thr982) <sup>b</sup>                        | DF7576      | 125                    | 1/2000        |
| eIF-2 $\alpha$ <sup>c</sup>                          | 9722s       | 38                     | 1/1000        |
| P- eIF-2 $\alpha$ (S51) <sup>c</sup>                 | 9721s       | 38                     | 1/1000        |
| ATF4 <sup>a</sup>                                    | bs-1531r    | 38                     | 1/2000        |
| CHOP <sup>c</sup>                                    | 5554s       | 27                     | 1/1000        |
| IRE-1 <sup>a</sup>                                   | bs-8680r    | 105                    | 1/2000        |
| P-IRE-1 (S724) <sup>d</sup>                          | ab48187     | 110                    | 1/2000        |
| Bcl-2 <sup>a</sup>                                   | bs-33047m   | 26                     | 1/500         |
| Cytochrome C <sup>d</sup>                            | ab133504    | 11                     | 1/5000        |
| Caspase-9 <sup>d</sup>                               | ab25758     | 52                     | 1/1000        |
| Cleaved Caspase-9 (Asp353) <sup>c</sup>              | 9509s       | 37                     | 1/1000        |
| Bax <sup>d</sup>                                     | ab32503     | 21                     | 1/2000        |
| Bid <sup>d</sup>                                     | ab62469     | 22                     | 1/2000        |
| Nrf2 <sup>d</sup>                                    | ab89443     | 68                     | 1/2000        |
| Keap1 <sup>d</sup>                                   | ab150654    | 70                     | 1/2000        |
| HO-1 <sup>a</sup>                                    | bs-2075r    | 32                     | 1/1500        |
| T- inhibitor of $\kappa$ B (I $\kappa$ B) $\alpha^d$ | ab32518     | 36                     | 1/2000        |
| P- I $\kappa$ B $\alpha$ (S32+S36) <sup>d</sup>      | ab12135     | 35.6-40                | 1/500         |
| T- NF- $\kappa$ B p65 <sup>d</sup>                   | ab16502     | 64                     | 1/2000        |
| P- NF- $\kappa$ B p65 (S536) <sup>d</sup>            | ab86299     | 60                     | 1/2000        |
| GAPDH <sup>e</sup>                                   | E-AB-20032  | 37                     | 1/2000        |
| Goat Anti-Rabbit (H+L) <sup>e</sup>                  | E-AB-1003   | \                      | 1/4000        |
| Goat-Anti-Mouse (H+L) <sup>e</sup>                   | E-AB-1001   | \                      | 1/4000        |

<sup>a</sup> Antibodies were purchased from Beijing Biosynthesis Biotechnology Co., Ltd. (Beijing, China). <sup>b</sup> Antibody were purchased from Affinity Biosciences. Ltd. (Changzhou, Jiangsu, China). <sup>c</sup> Antibodies were purchased from Cell Signaling Technology (CST) (Shanghai) Biological Reagents Co., Ltd. (Shanghai, China). <sup>d</sup> Antibodies were purchased from Abcam China (Shanghai, China). <sup>e</sup> Antibodies were purchased from Elabscience Biotechnology Co., Ltd. (Wuhan, Hubei, China). Abbreviations: ATF4, activating transcription factor 4; Bax, Bcl-2-Associated X; Bcl-2, B-cell lymphoma-2; Bid, a BH3 domain-only death agonist protein; CHOP, CCAAT enhancer binding protein (C/EBP)-homologous protein; eIF, eukaryotic initiation factor; GAPDH, glyceraldehyde-3-phosphate dehydrogenase; HO-1, Heme Oxygenase -1; IRE-1, inositol-requiring enzyme-1; I $\kappa$ B, inhibitor of NF- $\kappa$ B; Keap1, kelch-like ECH-associated protein 1; NF- $\kappa$ B, nuclear factor-kappa B; Nrf2, nuclear factor erythroid 2-related factor 2; P, phospho; PERK, pancreatic ER kinase.

**Table S2** All of the detailed parameters of target cytokines obviously decreased or increased among experimental groups.

| Symbol                                              | fc..WT-APP/PS1 | fc..ACPS2-APP/PS1 | Symbol       | fc..WT-APP/PS1 | fc..ACPS2-APP/PS1 |
|-----------------------------------------------------|----------------|-------------------|--------------|----------------|-------------------|
| <b>Upregulated proteins by ACPS2 (Number: 26)</b>   |                |                   |              |                |                   |
| Sdhd                                                | 2909.7%        | 2356.1%           | Asns         | 193.2%         | 182.7%            |
| Prkcd                                               | 1663.1%        | 1944.1%           | Tsg101       | 111.1%         | 180.1%            |
| Shank3                                              | 2263.7%        | 1580.2%           | Synpo        | 136.4%         | 172.4%            |
| Synpr                                               | 847.1%         | 722.4%            | Mff          | 131.1%         | 155.7%            |
| Pepd                                                | 515.3%         | 447.5%            | Camk4        | 172.0%         | 153.5%            |
| Prpsap2                                             | 529.2%         | 404.6%            | Crip2        | 140.6%         | 147.6%            |
| Prrt3                                               | 387.9%         | 367.4%            | Ly6h         | 133.0%         | 140.3%            |
| Hnrnpdl                                             | 300.1%         | 325.1%            | Nebl         | 150.2%         | 135.2%            |
| Phactr1                                             | 258.6%         | 305.8%            | Ppp1r1b      | 258.2%         | 133.9%            |
| Nrgn                                                | 178.2%         | 274.6%            | Srsf3        | 119.7%         | 127.1%            |
| Huwe1                                               | 295.2%         | 268.9%            | Rab5c        | 154.9%         | 126.9%            |
| Ermn                                                | 183.9%         | 217.6%            | Txnrd1       | 104.7%         | 119.5%            |
| Dlgap2                                              | 120.1%         | 202.9%            | Mink1        | 142.5%         | 103.4%            |
| <b>Downregulated proteins by ACPS2 (Number: 28)</b> |                |                   |              |                |                   |
| Slc4a7                                              | -98.7%         | -99.5%            | Fxyd6        | -63.9%         | -81.5%            |
| Rabep1                                              | -52.5%         | -97.2%            | Calu         | -86.6%         | -81.4%            |
| Ckap4                                               | -85.9%         | -94.4%            | Pdk3         | -61.6%         | -81.4%            |
| 2-Mar                                               | -55.0%         | -94.3%            | Nova2;Nova1  | -89.2%         | -79.6%            |
| Cops3                                               | -93.2%         | -92.2%            | Sar1b        | -66.7%         | -77.2%            |
| Rpl9                                                | -89.9%         | -90.2%            | Mlec         | -80.6%         | -76.5%            |
| Vamp1                                               | -69.0%         | -89.1%            | Cul2         | -78.6%         | -69.8%            |
| Rab3c                                               | -80.5%         | -88.9%            | Cmb1         | -52.2%         | -65.7%            |
| Banf1                                               | -82.1%         | -88.1%            | Ciapin1      | -66.4%         | -61.6%            |
| Rab18                                               | -87.9%         | -87.6%            | Traf3        | -75.4%         | -60.6%            |
| Bcan                                                | -90.4%         | -84.0%            | Hbb-b2;Hbbt2 | -98.1%         | -56.1%            |
| Comtd1                                              | -80.1%         | -83.9%            | Pthr2        | -52.5%         | -54.6%            |
| Echl                                                | -60.7%         | -83.8%            | Bri3bp       | -53.2%         | -53.7%            |
| Slc16a1                                             | -88.9%         | -82.7%            | Alg2         | -71.1%         | -51.4%            |
